# Supplementary material for: The Open Birth Interval: A Resource for Reproductive Health Programs and Women's Empowerment
Source: Glob Health Sci Pract. 2019 Sep 23;7(3):355–70. doi: 10.9745/GHSP-D-19-00056 (PMC6816813; doi:10.9745/GHSP-D-19-00056)
Supplement: 19-00056-Ross-Supplement1.xlsx [file 19-00056-Ross-Supplement1.xlsx]

## Sheet: Annex 1 July 2019
SUPPLEMENT 1. Open Interval Distribution by Region and Year, 74 Countries, Latest Demographic and Health Surveys
							Length of Interval
Country	Currently Pregnant	Under 1 Yr.	Sum: Pregnant or < 1 Yr.	1.0-1.9	2.0-2.9	3.0-3.9	4.0-4.9	5.0-5.9	6.0-6.9	7.0-7.9	8.0-8.9	9.0-9.9	10.0-10.9	11.0-11.9	12.0-12.9	13.0-13.9	14.0-14.9	15+	Total
MEANS, All Countries	8.14237	17.5066	25.649	14.7939	10.0713	7.23314	5.61575	4.59107	4.53455	3.7107	3.21288	2.68404	2.55615	2.09101	2.02131	1.75183	1.49799	7.98539	100
East/Southern Sub-Saharan Africa
Burundi 2016-17	12.1997	25.0592	37.2588	23.8762	12.023	6.26665	4.85293	3.41843	2.7763	2.34311	1.78004	1.29085	1.11623	0.737427	0.634175	0.301706	0.20921	1.11493	100
Comoros 2012	10.6097	23.4273	34.037	18.1065	9.90735	6.4708	4.61935	4.31936	3.71428	2.38375	2.35126	2.24369	2.43979	1.51354	1.51387	0.997194	1.11728	4.26502	100
Ethiopia 2016	9.52674	22.2149	31.7416	18.9645	11.5092	8.59986	6.43529	4.18373	4.25446	2.94747	2.39538	1.90025	2.04377	1.00233	0.755978	0.95902	0.448342	1.85881	100
Kenya 2014	7.52554	17.0929	24.6184	15.9836	12.0854	8.99269	6.91445	5.47605	4.92714	3.84757	2.96149	2.61814	2.18389	1.62137	1.46154	0.993145	0.933448	4.38162	100
Lesotho 2014	4.08972	16.19	20.2798	15.7141	12.1308	7.711	6.47891	5.39644	5.57238	4.53743	3.67645	2.93783	2.28607	2.04816	1.91	1.27539	1.49486	6.55046	100
Madagascar 2008-09	9.25403	20.1913	29.4453	15.7376	10.9969	7.91455	6.16176	4.50043	4.86203	3.12631	3.58833	1.91561	2.0356	1.28768	1.35664	1.19424	1.16607	4.71088	100
Malawi 2015-16	7.87271	18.0664	25.9391	17.1767	14.0424	10.6292	7.16493	5.13026	5.00715	2.88253	2.17572	1.84204	1.52501	1.43586	1.03186	0.77749	0.590926	2.64881	100
Mozambique 2011	12.2605	24.942	37.2026	21.6037	9.79347	5.68341	3.70301	2.76447	3.68419	2.60035	2.03886	1.33384	1.18256	1.49343	1.00986	0.970514	0.717406	4.21832	100
Namibia 2013	7.7639	16.2225	23.9864	12.3074	10.7734	9.08287	7.34349	5.4346	4.3935	4.16076	3.37512	3.44589	2.1896	1.84747	1.62331	1.97866	1.48841	6.56916	100
Rwanda 2014-15	10.1214	20.0374	30.1588	17.5462	12.7633	9.21384	5.37616	4.83759	5.38417	3.87211	3.26582	2.32113	1.68178	0.905511	0.781294	0.268853	0.313822	1.30969	100
South Africa 1998	4.33927	11.5161	15.8554	9.65382	9.56035	7.11402	7.13981	6.63547	6.72399	4.89471	4.46807	3.64065	3.40271	2.3245	2.75406	2.29915	2.08156	11.4518	100
Swaziland 2006-07	7.30988	15.471	22.7808	14.2179	10.7075	9.17974	6.16374	4.60439	5.67187	4.01248	2.53273	2.81581	2.93521	1.91923	1.77313	1.8107	1.2927	7.58205	100
Tanzania 2015-16	9.98818	21.0845	31.0727	19.8944	11.8782	7.44102	5.70281	4.20789	3.33351	2.67779	2.17116	1.77531	1.77248	1.08192	1.40037	0.959096	0.589343	4.04205	100
Uganda 2016	12.3605	24.6544	37.0149	18.1742	11.6274	7.40131	5.57595	4.18151	3.2875	2.42353	2.09548	1.41479	1.5797	0.997871	0.94944	0.651856	0.520338	2.10427	100
Zambia 2013-14	10.8485	21.2149	32.0634	20.6322	13.0893	8.35877	6.29241	3.84694	3.51554	2.14225	1.77712	1.37434	1.23584	0.976235	0.705232	0.94176	0.50019	2.54846	100
Zimbabwe 2015	7.55581	17.8333	25.3891	17.366	14.156	9.89294	8.0655	5.7418	3.1922	3.05793	2.01433	2.12663	1.4497	1.24822	1.12181	1.19459	0.798652	3.18465	100
MEANS	8.97663	19.7011	28.6778	17.3097	11.6902	8.12204	6.12441	4.66746	4.39376	3.24438	2.66671	2.1873	1.94125	1.40255	1.29891	1.09833	0.89141	4.28381	100
West/Central Sub-Saharan Africa
Angola 2015-16	11.5003	27.401	38.9014	21.5033	11.2655	6.2807	4.51685	3.75826	2.89863	2.33514	1.88478	0.944783	1.08773	0.638948	0.816626	0.645247	0.527536	1.99456	100
Benin 2011-12	11.1271	21.794	32.9211	19.6002	11.3294	8.15207	4.79354	3.89812	4.09713	3.06222	2.47422	1.46089	1.58504	1.14759	1.26314	0.673221	0.653975	2.88811	100
Burkina Faso 2010	11.312	23.7678	35.0798	20.9884	13.1678	7.79169	4.43872	2.8846	3.56979	2.36706	1.9432	1.5062	1.47459	0.820434	0.769683	0.702304	0.484963	2.01069	100
Cameroon 2011	13.0773	23.828	36.9054	19.0553	9.28015	5.97107	4.17116	3.17621	3.61365	3.19098	2.1323	1.48196	2.01653	1.14357	1.0892	1.16886	0.825507	4.77822	100
Central African Republic 1994-95	13.1234	23.6689	36.7923	17.2324	8.93999	5.90634	5.05071	3.70319	4.42706	2.39166	2.57301	1.35236	1.57128	1.07933	1.39651	0.752664	1.09232	5.73883	100
Chad 2014-15	16.0838	27.423	43.5069	19.5474	10.7995	5.00038	3.96319	2.76545	3.456	2.61534	1.8913	1.02259	1.37602	0.601288	0.8443	0.401822	0.482658	1.72592	100
Congo 2011-12	12.5171	23.7162	36.2333	18.6498	10.3625	7.38675	4.84341	3.37629	3.24305	2.42269	2.23389	1.61602	1.2747	1.19276	1.19798	0.867147	0.8089	4.29075	100
Congo Democratic Republic 2013-14	15.1319	29.4528	44.5847	20.4714	10.4012	4.81135	3.18175	2.6932	2.51123	2.09873	1.46629	1.41616	1.23292	0.98857	0.522359	0.676698	0.590196	2.35323	100
Cote d'Ivoire 2011-12	12.1953	22.3216	34.5169	19.2418	10.3857	7.49197	4.97986	3.31088	3.97044	2.6931	2.47871	1.88819	1.85132	1.21079	1.05791	0.922596	0.719208	3.28059	100
Gabon 2012	11.594	20.2626	31.8565	12.9534	9.75714	6.83595	5.06722	5.22049	4.36631	3.85698	2.88655	1.30113	2.29617	1.48434	1.31928	1.10231	1.33234	8.36389	100
Gambia 2013	10.7995	27.4641	38.2636	22.9965	10.1052	6.08093	4.02438	2.72527	3.22386	2.13294	1.6602	1.75275	1.17464	0.896806	0.69914	0.586485	0.515391	3.16191	100
Ghana 2014	9.79474	20.4118	30.2065	17.1382	11.2151	7.08201	5.66939	4.10365	4.54008	2.94083	3.01102	2.08059	1.98684	1.59517	1.64507	1.06124	1.26277	4.46151	100
Guinea 2012	12.3818	21.9569	34.3387	18.5347	11.5798	6.95318	4.04427	3.06168	4.34814	3.59098	2.48013	1.64934	2.23784	0.998722	1.41232	0.615669	0.833557	3.32102	100
Liberia 2013	10.0241	18.7808	28.8049	16.0314	10.2586	8.43315	6.40024	5.17467	5.36949	3.50208	3.2076	2.0252	2.14868	1.48124	1.40021	1.16627	0.727351	3.8689	100
Mali 2012-13	12.469	24.6466	37.1156	19.3725	12.9118	7.70351	4.83575	3.00457	2.95618	2.25355	1.94117	1.28366	1.4481	0.913322	1.08787	0.809946	0.444477	1.91804	100
Niger 2012	15.083	30.5367	45.6197	21.8826	11.0669	5.40334	3.04286	2.27333	2.91825	2.11695	1.26587	0.828788	1.02114	0.517125	0.403031	0.386678	0.345338	0.908148	100
Nigeria 2013	14.7593	24.1698	38.9291	19.439	10.1676	5.89208	3.984	3.07597	3.14849	2.6793	2.36911	1.55265	1.79244	0.945749	1.22192	1.00876	0.531865	3.26204	100
Sao Tome and Principe 2008-09	10.1116	22.0341	32.1457	16.057	13.5451	8.67403	5.0408	3.12799	4.91187	2.6229	1.87656	2.27216	1.97165	1.15134	1.1897	0.878038	0.858173	3.677	100
Senegal 2016	11.9312	21.7456	33.6768	19.4688	11.8805	8.52815	5.83643	4.38562	3.65946	3.01832	2.29961	1.68522	1.12753	0.862045	0.573969	0.92954	0.437649	1.63032	100
Sierra Leone 2013	9.90334	20.8969	30.8003	17.492	11.4608	8.10755	5.21209	4.99525	4.83768	3.51858	2.70206	1.64749	1.78958	1.04817	1.07812	0.829118	0.657357	3.82388	100
Togo 2013-14	10.3494	20.3678	30.7173	19.8287	12.6954	7.3615	5.63939	3.39477	4.01932	3.21974	2.35176	1.94077	1.40287	1.21601	1.08093	0.969611	0.750556	3.41141	100
MEANS	12.1557	23.6499	35.8055	18.9278	11.075	6.94513	4.70171	3.52902	3.81362	2.79191	2.24425	1.55757	1.61274	1.04444	1.05092	0.816868	0.708671	3.37471	100
Asia
Afghanistan 2015	20.6046	22.0855	42.6901	15.9889	10.1862	5.45659	3.61872	2.58619	3.99283	2.86214	2.61423	1.62723	2.01776	0.890433	1.05091	0.727012	0.979972	2.71076	100
Bangladesh 2014	4.09637	9.99489	14.0913	10.2119	8.62257	7.50559	6.50263	5.66576	5.49637	5.4307	4.4652	3.39371	4.06407	2.98347	3.24765	2.88489	2.45826	12.976	100
Cambodia 2014	4.411	13.3477	17.7587	12.088	9.44733	7.70004	6.87646	5.66047	6.06685	5.33468	3.62414	3.88662	3.11826	2.70357	2.80316	2.33153	2.25704	8.34314	100
India 2015-16	3.9982	10.068	14.0662	8.77598	6.6792	5.68878	4.88893	4.36293	4.67792	4.38174	4.20017	3.52284	3.96862	3.33335	3.56604	3.33131	3.03356	21.5224	100
Indonesia 2012	3.94784	11.1372	15.0851	10.0593	8.67169	7.87682	6.99748	6.42947	5.52781	4.85695	4.65881	4.17438	3.29279	3.31502	2.8599	2.29305	1.98184	11.9197	100
Maldives 2009	5.40171	14.6851	20.0868	12.8101	9.50709	7.63205	6.7364	4.7616	4.55693	4.37294	4.51971	3.59151	3.07446	2.85854	3.20803	2.27498	1.76582	8.24304	100
Myanmar 2015-16	4.46716	11.8705	16.3377	11.0145	8.95522	8.77207	6.52479	6.1749	5.63887	5.09361	4.41809	4.10418	3.85297	2.9068	2.71967	2.75845	1.96869	8.7595	100
Nepal 2016	3.47339	10.2601	13.7335	10.361	8.09486	6.74996	6.01014	5.14378	4.33947	4.15235	4.38502	3.72814	4.25422	3.44101	3.29719	3.6378	2.67034	16.0012	100
Pakistan 2012-13	9.52642	19.4635	28.9899	14.194	10.3796	7.34709	4.80732	4.88031	3.56395	3.82221	3.44529	2.30391	2.72389	1.85232	2.48647	1.78424	1.58876	5.83072	100
Philippines 2013	4.86682	13.8588	18.7256	12.2568	8.73526	7.7063	6.27804	6.29491	5.4954	4.80624	4.07295	3.35984	3.42063	2.92644	2.34032	2.46074	1.5857	9.53484	100
Timor-Leste 2016	7.0342	19.8446	26.8788	16.6542	10.8191	8.40526	6.05477	4.32046	5.59609	3.87152	3.33969	3.1601	2.88603	1.93423	1.54223	1.20461	0.731678	2.60126	100
Viet Nam 2002	2.81177	7.5227	10.3345	8.11097	6.99667	6.03168	5.76209	5.8505	5.63153	6.27572	6.52171	5.28227	5.58044	4.54331	4.60211	3.42907	3.01063	12.0368	100
MEANS	6.21996	13.6782	19.8982	11.8771	8.92456	7.23935	5.92148	5.17761	5.04867	4.60507	4.18875	3.51123	3.52118	2.80737	2.81031	2.42647	2.00269	10.04	100
Central Asia Rep.
Kazakhstan 1999	3.06086	8.16478	11.2256	7.65387	6.66762	5.52578	6.15616	5.80048	5.87822	5.35921	5.5069	4.86014	5.20635	5.1957	3.64375	4.27966	3.01675	14.0238	100
Kyrgyz Republic 2012	7.79162	18.3229	26.1145	12.8393	8.8023	7.19183	5.4261	3.73019	3.99723	3.80412	3.29013	2.64172	2.53283	2.01344	2.1055	2.39329	1.75792	11.3596	100
Tajikistan 2012	8.20274	17.0726	25.2754	13.841	11.0259	6.45524	4.65002	3.68832	4.52763	4.0575	3.00846	3.4542	2.74544	2.20503	3.11913	2.05113	2.15403	7.74157	100
Uzbekistan 1996	6.4289	14.3336	20.7625	13.9641	9.84693	7.396	8.15715	5.87502	5.05584	3.81013	3.88694	3.64749	3.01031	2.93355	2.06827	2.07012	1.89162	5.62399	100
MEANS	6.37103	14.4735	20.8445	12.0746	9.08569	6.64221	6.09736	4.77351	4.86473	4.25774	3.92311	3.65089	3.37373	3.08693	2.73416	2.69855	2.20508	9.68724	100
Middle East/N. Africa
Egypt 2014	7.892	17.1898	25.0818	13.9234	9.73213	7.54201	5.012	5.4588	4.60732	3.28424	3.13404	2.72058	3.00947	2.52018	2.24721	2.10314	1.64747	7.9762	100
Jordan 2012	8.51328	16.9352	25.4485	15.0344	11.1681	8.28436	6.96132	5.11747	3.47759	3.95091	3.95367	2.64788	2.30331	2.13001	2.11282	1.53927	1.40367	4.46677	100
Morocco 2003-04	5.9841	14.0311	20.0152	12.9281	10.2321	9.29462	6.92248	5.74296	5.28472	3.98514	3.62979	4.03857	3.14655	2.81448	2.17582	1.78171	1.64067	6.36709	100
Turkey 2003	4.29326	10.4621	14.7553	8.90731	8.52636	7.34765	5.98079	5.03313	5.69135	4.54989	3.98165	3.61577	3.17688	2.95921	2.4695	3.00737	2.7314	17.2664	100
Yemen 2013	12.5508	22.58	35.1308	16.5564	11.0519	7.18694	5.81065	3.56772	4.3337	3.42847	2.58304	1.83553	1.99394	1.30703	1.3604	1.11915	0.628384	2.10597	100
MEANS	7.84668	16.2396	24.0863	13.4699	10.1421	7.93112	6.13745	4.98402	4.67894	3.83973	3.45644	2.97167	2.72603	2.34618	2.07315	1.91013	1.61032	7.63649	100
Europe/W. Asia
Albania 2008-09	1.90727	5.77728	7.68454	5.07458	5.42877	4.89834	5.47588	5.02249	4.38202	5.44075	6.07682	4.26493	4.72152	5.06696	5.01763	5.25981	3.67348	22.5115	100
Armenia 2015-16	2.91265	9.21219	12.1248	7.9936	6.92159	5.30777	4.88148	4.4573	4.65649	4.48936	4.35859	3.70226	3.07619	2.96984	3.01988	2.91424	2.53078	26.5958	100
Azerbaijan 2006	3.10249	9.52102	12.6235	7.41098	5.7906	4.77496	3.64472	3.28882	4.90705	4.18999	4.05575	4.77184	4.84307	4.49841	4.99827	3.60978	4.0499	22.5424	100
Moldova 2005	2.18289	6.66812	8.85101	7.24415	5.71011	4.58684	3.92464	3.85223	3.9385	4.19657	3.34444	4.19345	4.02483	4.17989	4.17534	3.50381	4.27651	29.9977	100
Ukraine 2007	2.80421	4.72082	7.52504	5.21116	5.51291	4.53343	4.30546	3.76002	3.70846	3.27789	3.3465	3.64641	3.63141	4.00771	3.84476	3.72448	3.60038	36.364	100
MEANS	2.5819	7.17989	9.76179	6.5869	5.87279	4.82027	4.44643	4.07617	4.3185	4.31891	4.23642	4.11578	4.05941	4.14456	4.21118	3.80242	3.62621	27.6023	100
Latin America
Bolivia 2008	6.61692	15.0462	21.6631	13.6409	9.36297	7.84459	6.29806	6.23814	5.98015	5.22823	4.09409	2.91307	2.89973	2.74667	2.08584	1.79351	1.18417	6.02673	100
Brazil 1996	4.2235	10.5833	14.8068	9.23357	7.67388	6.87081	5.89218	5.70037	6.17891	5.63445	4.9638	4.5706	4.5147	3.38203	2.93369	3.17834	3.4353	11.0305	100
Colombia 2015	2.97013	9.06579	12.0359	8.54524	7.36112	6.80304	5.93892	6.4929	5.82195	4.63465	4.30023	3.8638	3.45404	3.78316	3.77435	3.11848	3.24084	16.8314	100
Dominican Republic 2013	5.90497	10.6335	16.5385	10.6117	8.43344	6.94981	5.28972	5.36058	4.59842	3.43694	3.62976	3.63919	3.86249	2.93809	2.58456	2.92252	2.50386	16.7004	100
Guatemala 2014-15	6.25157	15.4477	21.6992	12.8445	10.3428	8.29912	6.96485	4.92969	4.49992	4.28839	3.49888	3.02314	2.93902	2.47627	2.6456	2.0737	1.97075	7.50413	100
Guyana 2009	4.82216	11.9123	16.7344	9.51621	8.50293	5.03667	4.76973	5.68043	5.14634	4.6267	4.67568	3.89226	3.51827	3.39808	4.16647	2.99312	2.33555	15.0071	100
Haiti 2012	7.57752	18.5547	26.1322	14.0416	11.0604	7.46676	6.68761	5.25447	4.83228	3.96426	2.98828	2.65892	2.5286	2.17712	2.11028	2.05595	0.90332	5.13794	100
Honduras 2011-12	5.72877	13.9052	19.634	12.9288	10.0127	8.06373	6.75587	5.35493	4.9027	3.99992	3.87397	3.46033	3.21551	2.9671	2.86369	2.00119	2.01831	7.94733	100
Nicaragua 2001	5.55722	13.1408	18.698	13.4275	10.4854	7.82543	6.26939	5.68757	6.45169	5.30987	4.3679	3.00433	2.40941	2.82735	2.46451	1.89203	1.36988	7.50969	100
Paraguay 1990	10.0159	19.7794	29.7954	14.8868	9.53595	7.24902	6.69952	5.5692	4.81106	3.87688	2.60378	2.81126	1.97436	1.41842	1.11561	1.21189	0.933567	5.5073	100
Peru 2012	4.1668	11.0048	15.1716	10.7222	9.48471	8.06817	6.90961	6.15103	6.37493	5.11799	3.93977	3.8441	2.6968	2.55587	2.92792	2.16779	2.25813	11.6094	100
MEANS	5.80323	13.5522	19.3554	11.8545	9.29602	7.31611	6.22504	5.67448	5.41803	4.55621	3.90329	3.42555	3.09208	2.7882	2.6975	2.30987	2.01397	10.0738	100
In: Ross J, Bietsch K. The open birth interval: a resource for reproductive health programs and women’s empowerment. Glob Health Sci Pract. 2019;7(3). https:/doi.org/10.9745/GHSP-D-19-00056
