# Supplementary material for: The Open Birth Interval: A Resource for Reproductive Health Programs and Women's Empowerment
Source: Glob Health Sci Pract. 2019 Sep 23;7(3):355–70. doi: 10.9745/GHSP-D-19-00056 (PMC6816813; doi:10.9745/GHSP-D-19-00056)
Supplement: 19-00056-Ross-Supplement2.xlsx [file 19-00056-Ross-Supplement2.xlsx]

## Sheet: ANNEX 2 Ross edits
																																			SUPPLEMENT 2. Open Intervals by Exclusive Statuses, by Region, Latest Surveys
																																					Open Interval Lengths (months)
												Pregnant	Cp Trad	Cp Short	Cp Long	UN Intends	UN no intend	No UN Intends	No UN No intend	Infecund	SUM		Pregnant	Cp Trad	Cp Short	Cp Long	UN Intends	UN no intend	No UN Intends	No UN No intend	Infecund				ALL REGIONS	Preg/1-11 mo.	12-23	24-35	36-47	48-59	60+
						1				1	OVERALL MEANS	0.084485	0.0101903	0.0364748	0.00904977	0.030935	0.0182201	0.0354408	0.0322973	0.00305373	0.260147	OVERALL MEANS	32.4759	3.91712	14.0209	3.47872	11.8914	7.00378	13.6234	12.415	1.17385	100			Preg/Yr 1	32.4759	0	0	0	0	0
										1	OVERALL MEANS	0	0.0134415	0.0453303	0.0142603	0.0215275	0.0226983	0.0117787	0.0178813	0.00223525	0.149153	OVERALL MEANS	0	9.01186	30.3918	9.56082	14.4331	15.2181	7.89706	11.9886	1.49863	100			Using, Traditional	3.91712	9.01186	9.63649	9.83839	10.1556	11.9202
										1	OVERALL MEANS	0	0.00979639	0.034013	0.0139687	0.0109772	0.014132	0.00596118	0.0114172	0.00139359	0.101659	OVERALL MEANS	0	9.63649	33.4579	13.7407	10.798	13.9014	5.86389	11.2309	1.37084	100			Using, Modern Short Acting	14.0209	30.3918	33.4579	32.8894	30.5173	18.5117
										1	OVERALL MEANS	0	0.00711354	0.0237803	0.0117947	0.00609548	0.00956838	0.00445714	0.00808156	0.00141272	0.0723039	OVERALL MEANS	0	9.83839	32.8894	16.3127	8.43036	13.2336	6.16446	11.1772	1.95386	100			Using, Modern, Long Acting	3.47872	9.56082	13.7407	16.3127	19.1976	23.0477
										1	OVERALL MEANS	0	0.00564991	0.0169778	0.0106803	0.00396959	0.00730511	0.00335586	0.00615786	0.00153692	0.0556334	OVERALL MEANS	0	10.1556	30.5173	19.1976	7.13528	13.1308	6.03211	11.0687	2.76259	100			Using, Any Method	21.4167	48.9645	56.8351	59.0405	59.8706	53.4796
										1	OVERALL MEANS	0	0.0430442	0.0668463	0.0832259	0.0109911	0.0217187	0.00878311	0.00881368	0.11768	0.361103	OVERALL MEANS	0	11.9202	18.5117	23.0477	3.04377	6.01453	2.4323	2.44076	32.5891	100			Unmet Need, Intends Use	11.8914	14.4331	10.798	8.43036	7.13528	3.04377
																					0		#DIV/0!	#DIV/0!	#DIV/0!	#DIV/0!	#DIV/0!	#DIV/0!	#DIV/0!	#DIV/0!	#DIV/0!	#DIV/0!			Unmet Need, Does Not Intend	7.00378	15.2181	13.9014	13.2336	13.1308	6.01453
										2	E/S Africa	0.0904079	0.00544998	0.0572667	0.0090384	0.0399231	0.0164374	0.0436358	0.0234086	0.00290567	0.288474	E/S Africa	31.3401	1.88925	19.8516	3.13318	13.8394	5.69807	15.1264	8.11465	1.00726	100			No Unmet Need, Intends Use	13.6234	7.89706	5.86389	6.16446	6.03211	2.4323
										2	E/S Africa	0	0.00774488	0.0766077	0.0148849	0.0249278	0.0185789	0.0152006	0.0139054	0.00231319	0.174163	E/S Africa	0	4.44691	43.9861	8.54653	14.3129	10.6675	8.72777	7.9841	1.32817	100			No Unmet Need, Does Not Intend	12.415	11.9886	11.2309	11.1772	11.0687	2.44076
										2	E/S Africa	0	0.00523064	0.0573191	0.014588	0.0126641	0.0115782	0.00650741	0.00784782	0.00150641	0.117242	E/S Africa	0	4.46141	48.8897	12.4427	10.8017	9.8755	5.55042	6.69371	1.28487	100			Infecund	1.17385	1.49863	1.37084	1.95386	2.76259	32.5891
										2	E/S Africa	0	0.00332312	0.0370406	0.0120467	0.00711342	0.0086643	0.00548807	0.00586714	0.00167963	0.081223	E/S Africa	0	4.09135	45.6036	14.8316	8.75789	10.6673	6.7568	7.22349	2.06792	100				100	100	100	100	100	100
										2	E/S Africa	0	0.00247506	0.025968	0.00958206	0.00487075	0.00656545	0.0044365	0.00523585	0.00156033	0.060694	E/S Africa	0	4.07793	42.7851	15.7875	8.02509	10.8173	7.30962	8.62664	2.57082	100
										2	E/S Africa	0	0.0106032	0.0819971	0.0435826	0.012143	0.0181481	0.0131733	0.00974828	0.0888088	0.278204	E/S Africa	0	3.81129	29.4737	15.6657	4.36477	6.5233	4.73511	3.504	31.9222	100			EAST/SOUTHERN AFRICA	Preg/1-11 mo.	12-23	24-35	36-47	48-59	60+
										3	W/C Africa	0.123318	0.0102761	0.0231783	0.00248216	0.0405776	0.0277275	0.0537053	0.0691478	0.00479092	0.355204	W/C Africa	34.7176	2.893	6.52535	0.698799	11.4238	7.80609	15.1196	19.4671	1.34878	100			Preg/Yr 1	31.3401	0	0	0	0	0
										3	W/C Africa	0	0.0140239	0.0310584	0.00466056	0.0339727	0.0400159	0.0210267	0.0406642	0.00392868	0.189351	W/C Africa	0	7.40631	16.4026	2.46133	17.9417	21.1332	11.1046	21.4755	2.07481	100			Using, Traditional	1.88925	4.44691	4.46141	4.09135	4.07793	3.81129
										3	W/C Africa	0	0.00929388	0.0215571	0.00498942	0.0156393	0.0227386	0.0101993	0.0262711	0.00227097	0.11296	W/C Africa	0	8.22761	19.0839	4.41699	13.8451	20.1298	9.02913	23.2571	2.01043	100			Using, Modern Short Acting	19.8516	43.9861	48.8897	45.6036	42.7851	29.4737
										3	W/C Africa	0	0.00531834	0.0139069	0.00308426	0.00723504	0.0148461	0.00616099	0.0177748	0.00194102	0.0702674	W/C Africa	0	7.56872	19.7914	4.38932	10.2964	21.128	8.76792	25.2959	2.76234	100			Using, Modern, Long Acting	3.13318	8.54653	12.4427	14.8316	15.7875	15.6657
										3	W/C Africa	0	0.00343539	0.0084466	0.0022639	0.00429864	0.0101531	0.0040522	0.0124238	0.00218296	0.0472566	W/C Africa	0	7.26966	17.8739	4.79065	9.09639	21.485	8.57489	26.2901	4.61939	100			Using, Any Method	24.8741	56.9795	65.7938	64.5266	62.6505	48.9507
										3	W/C Africa	0	0.011142	0.0210979	0.00749256	0.00454876	0.0114107	0.00596826	0.0119417	0.151359	0.224961	W/C Africa	0	4.95286	9.37845	3.3306	2.02202	5.07228	2.65301	5.30834	67.2824	100			Unmet Need, Intends Use	13.8394	14.3129	10.8017	8.75789	8.02509	4.36477
										4	Asia	0.0626669	0.00951335	0.032076	0.00714346	0.0215117	0.0170616	0.0255626	0.0212859	0.00318951	0.200011	Asia	31.3317	4.75641	16.0371	3.57153	10.7553	8.53032	12.7806	10.6424	1.59467	100			Unmet Need, Does Not Intend	5.69807	10.6675	9.8755	10.6673	10.8173	6.5233
										4	Asia	0	0.0129519	0.0434099	0.013002	0.014054	0.0197022	0.00551013	0.00835828	0.0019841	0.118972	Asia	0	10.8864	36.4874	10.9286	11.8128	16.5603	4.63144	7.0254	1.6677	100			No Unmet Need, Intends Use	15.1264	8.72777	5.55042	6.7568	7.30962	4.73511
										4	Asia	0	0.00905811	0.0342778	0.013153	0.00827216	0.0141758	0.00348339	0.00547945	0.00130224	0.0892019	Asia	0	10.1546	38.4272	14.7452	9.27352	15.8918	3.90506	6.14275	1.45988	100			No Unmet Need, Does Not Intend	8.11465	7.9841	6.69371	7.22349	8.62664	3.504
										4	Asia	0	0.00738402	0.0275004	0.0116733	0.00620936	0.0102177	0.00337837	0.00447422	0.00143337	0.0722707	Asia	0	10.2172	38.0519	16.1522	8.5918	14.1381	4.6746	6.19091	1.98334	100			Infecund	1.00726	1.32817	1.28487	2.06792	2.57082	31.9222
										4	Asia	0	0.00647907	0.0210439	0.0116156	0.00425455	0.00773694	0.00270178	0.00384883	0.00142271	0.0591033	Asia	0	10.9623	35.6052	19.653	7.1985	13.0905	4.57129	6.51204	2.40716	100				100	100	100	100	100	100
										4	Asia	0	0.0497468	0.102613	0.119664	0.0155794	0.0265183	0.0078468	0.00618246	0.13229	0.46044	Asia	0	10.8042	22.2858	25.989	3.38359	5.75934	1.7042	1.34273	28.7312	100
										5	Central Asia Rep/	0.0646831	0.00804704	0.00990148	0.0254069	0.0193681	0.0234791	0.0277057	0.0291682	0.0036359	0.211395	Central Asia Rep/	30.5981	3.80663	4.68386	12.0187	9.16202	11.1067	13.1061	13.7979	1.71995	100			WEST/CENTRAL AFRICA	Preg/1-11 mo.	12-23	24-35	36-47	48-59	60+
										5	Central Asia Rep/	0	0.00668274	0.0105685	0.0418081	0.0150942	0.0232189	0.00832695	0.0147776	0.000978064	0.121455	Central Asia Rep/	0	5.50224	8.70157	34.4227	12.4278	19.1173	6.856	12.1672	0.805289	100			Preg/Yr 1	34.7176	0	0	0	0	0
										5	Central Asia Rep/	0	0.00623821	0.00924088	0.0395726	0.00702012	0.0142186	0.00460355	0.00952867	0.000502602	0.0909253	Central Asia Rep/	0	6.86081	10.1632	43.5221	7.72076	15.6377	5.063	10.4797	0.552764	100			Using, Traditional	2.893	7.40631	8.22761	7.56872	7.26966	4.95286
										5	Central Asia Rep/	0	0.00340369	0.00766665	0.0343615	0.00404287	0.00903107	0.00218256	0.00520999	0.000790079	0.0666884	Central Asia Rep/	0	5.10386	11.4962	51.5255	6.06232	13.5422	3.27277	7.81244	1.18473	100			Using, Modern Short Acting	6.52535	16.4026	19.0839	19.7914	17.8739	9.37845
										5	Central Asia Rep/	0	0.00291666	0.0067818	0.0324561	0.00235837	0.00834808	0.00172882	0.00524137	0.000920227	0.0607514	Central Asia Rep/	0	4.80098	11.1632	53.4244	3.882	13.7414	2.84573	8.62757	1.51474	100			Using, Modern, Long Acting	0.698799	2.46133	4.41699	4.38932	4.79065	3.3306
										5	Central Asia Rep/	0	0.0320417	0.0345379	0.193655	0.0107851	0.0259854	0.00557872	0.00406373	0.142137	0.448784	Central Asia Rep/	0	7.13966	7.69587	43.1509	2.40317	5.79017	1.24307	0.905496	31.6716	100			Using, Any Method	10.1172	26.2702	31.7285	31.7494	29.9342	17.6619
										6	Middle East/N. Africa	0.0788683	0.0205381	0.0594985	0.0188089	0.0214472	0.0107585	0.0211851	0.00804793	0.00191643	0.241069	Middle East/N. Africa	32.7161	8.5196	24.6811	7.80229	8.89672	4.46283	8.78799	3.33843	0.794973	100			Unmet Need, Intends Use	11.4238	17.9417	13.8451	10.2964	9.09639	2.02202
										6	Middle East/N. Africa	0	0.0193926	0.0545735	0.028121	0.0117918	0.0106097	0.006543	0.00420648	0.000859649	0.136098	Middle East/N. Africa	0	14.249	40.0987	20.6623	8.66423	7.79567	4.80758	3.09078	0.631641	100			Unmet Need, Does Not Intend	7.80609	21.1332	20.1298	21.128	21.485	5.07228
										6	Middle East/N. Africa	0	0.013624	0.036217	0.0262298	0.00707367	0.00774638	0.00584886	0.00446626	0.000565409	0.101771	Middle East/N. Africa	0	13.3869	35.5866	25.7733	6.95054	7.61155	5.74706	4.38852	0.555567	100			No Unmet Need, Intends Use	15.1196	11.1046	9.02913	8.76792	8.57489	2.65301
										6	Middle East/N. Africa	0	0.0110928	0.0267318	0.0212874	0.00519904	0.00496889	0.00584401	0.00337865	0.000529895	0.0790324	Middle East/N. Africa	0	14.0358	33.8238	26.935	6.57837	6.28715	7.39445	4.27502	0.670478	100			No Unmet Need, Does Not Intend	19.4671	21.4755	23.2571	25.2959	26.2901	5.30834
										6	Middle East/N. Africa	0	0.00859934	0.0188157	0.0176099	0.00249018	0.00468056	0.0050116	0.00249631	0.000771036	0.0604746	Middle East/N. Africa	0	14.2198	31.1133	29.1195	4.11773	7.73972	8.28712	4.12787	1.27497	100			Infecund	1.34878	2.07481	2.01043	2.76234	4.61939	67.2824
										6	Middle East/N. Africa	0	0.0613896	0.0830728	0.107455	0.011335	0.020095	0.0113613	0.00533394	0.0815119	0.381555	Middle East/N. Africa	0	16.0893	21.7722	28.1625	2.97074	5.2666	2.97764	1.39795	21.3631	100				100	100	100	100	100	100
										7	Europe/W. Asia	0.0262851	0.0193592	0.0168303	0.00265748	0.00758836	0.0096372	0.00812754	0.00745766	0.00105116	0.098994	Europe/W. Asia	26.5522	19.5559	17.0013	2.68448	7.66547	9.73513	8.21013	7.53344	1.06184	100
										7	Europe/W. Asia	0	0.0278748	0.0138932	0.00757777	0.00413156	0.00871907	0.00134132	0.00286585	0.000122096	0.0665257	Europe/W. Asia	0	41.9008	20.884	11.3907	6.21047	13.1063	2.01625	4.30788	0.183532	100			ASIA	Preg/1-11 mo.	12-23	24-35	36-47	48-59	60+
										7	Europe/W. Asia	0	0.0233203	0.0136961	0.00904922	0.00304477	0.00663239	0.00123847	0.00208343	6.62025e-05	0.0591308	Europe/W. Asia	0	39.4384	23.1624	15.3037	5.1492	11.2165	2.09445	3.52343	0.111959	100			Preg/Yr 1	31.3317	0	0	0	0	0
										7	Europe/W. Asia	0	0.0195549	0.0102815	0.00840438	0.00234873	0.004678	0.00105514	0.00198932	9.67174e-05	0.0484086	Europe/W. Asia	0	40.3954	21.2389	17.3613	4.85189	9.66357	2.17966	4.10944	0.199794	100			Using, Traditional	4.75641	10.8864	10.1546	10.2172	10.9623	10.8042
										7	Europe/W. Asia	0	0.0175854	0.00834899	0.00845892	0.00103602	0.00518132	0.00137489	0.00202216	0.000303641	0.0443113	Europe/W. Asia	0	39.686	18.8417	19.0897	2.33805	11.693	3.10279	4.56353	0.685245	100			Using, Modern Short Acting	16.0371	36.4874	38.4272	38.0519	35.6052	22.2858
										7	Europe/W. Asia	0	0.254921	0.0861504	0.124074	0.0120186	0.0691672	0.00371889	0.00667909	0.1259	0.682629	Europe/W. Asia	0	37.344	12.6204	18.1759	1.76063	10.1325	0.544789	0.978436	18.4434	100			Using, Modern, Long Acting	3.57153	10.9286	14.7452	16.1522	19.653	25.989
										8	Latin America	0.0582134	0.00956015	0.0457509	0.0168027	0.027987	0.00844276	0.0194761	0.00698897	0.00086211	0.194084	Latin America	29.9939	4.92578	23.5727	8.65745	14.42	4.35005	10.0349	3.601	0.444194	100			Using, Any Method	24.3651	58.3024	63.327	64.4212	66.2205	59.079
										8	Latin America	0	0.0142886	0.0532038	0.0206436	0.0145159	0.00898296	0.00352332	0.00265728	0.00105194	0.118867	Latin America	0	12.0206	44.759	17.3669	12.2118	7.55713	2.96407	2.2355	0.884969	100			Unmet Need, Intends Use	10.7553	11.8128	9.27352	8.5918	7.1985	3.38359
										8	Latin America	0	0.0116547	0.0419775	0.0192687	0.00896894	0.00686588	0.00208498	0.00146762	0.000878156	0.0931665	Latin America	0	12.5095	45.0564	20.682	9.62679	7.36947	2.23791	1.57527	0.942566	100			Unmet Need, Does Not Intend	8.53032	16.5603	15.8918	14.1381	13.0905	5.75934
										8	Latin America	0	0.00980733	0.0308349	0.0180019	0.00506842	0.00412857	0.00246984	0.00180251	0.00117121	0.0732847	Latin America	0	13.3825	42.0755	24.5643	6.91607	5.63361	3.3702	2.45961	1.59816	100			No Unmet Need, Intends Use	12.7806	4.63144	3.90506	4.6746	4.57129	1.7042
										8	Latin America	0	0.00802039	0.0233224	0.0180315	0.00428167	0.00399305	0.00184439	0.00136347	0.00146834	0.0623252	Latin America	0	12.8686	37.4205	28.9313	6.86988	6.4068	2.9593	2.18768	2.35593	100			No Unmet Need, Does Not Intend	10.6424	7.0254	6.14275	6.19091	6.51204	1.34273
										8	Latin America	0	0.0460781	0.0928862	0.182869	0.0166468	0.0199112	0.0113438	0.00834785	0.0801891	0.458272	Latin America	0	10.0548	20.2688	39.904	3.63251	4.34485	2.47534	1.82159	17.4981	100			Infecund	1.59467	1.6677	1.45988	1.98334	2.40716	28.7312
																																				100	100	100	100	100	100
																																			CENTRAL ASIAN REP.	Preg/1-11 mo.	12-23	24-35	36-47	48-59	60+
										9	ALL REGIONS	0.084485	0.0101903	0.0364748	0.00904977	0.030935	0.0182201	0.0354408	0.0322973	0.00305373	0.260147	ALL REGIONS	32.4759	3.91712	14.0209	3.47872	11.8914	7.00378	13.6234	12.415	1.17385	100			Preg/Yr 1	30.5981	0	0	0	0	0
										9	ALL MEANS	0	0.0134415	0.0453303	0.0142603	0.0215275	0.0226983	0.0117787	0.0178813	0.00223525	0.149153	ALL MEANS	0	9.01186	30.3918	9.56082	14.4331	15.2181	7.89706	11.9886	1.49863	100			Using, Traditional	3.80663	5.50224	6.86081	5.10386	4.80098	7.13966
										9	ALL MEANS	0	0.00979639	0.034013	0.0139687	0.0109772	0.014132	0.00596118	0.0114172	0.00139359	0.101659	ALL MEANS	0	9.63649	33.4579	13.7407	10.798	13.9014	5.86389	11.2309	1.37084	100			Using, Modern Short Acting	4.68386	8.70157	10.1632	11.4962	11.1632	7.69587
										9	ALL MEANS	0	0.00711354	0.0237803	0.0117947	0.00609548	0.00956838	0.00445714	0.00808156	0.00141272	0.0723039	ALL MEANS	0	9.83839	32.8894	16.3127	8.43036	13.2336	6.16446	11.1772	1.95386	100			Using, Modern, Long Acting	12.0187	34.4227	43.5221	51.5255	53.4244	43.1509
										9	ALL MEANS	0	0.00564991	0.0169778	0.0106803	0.00396959	0.00730511	0.00335586	0.00615786	0.00153692	0.0556334	ALL MEANS	0	10.1556	30.5173	19.1976	7.13528	13.1308	6.03211	11.0687	2.76259	100			Using, Any Method	20.5091	48.6265	60.5461	68.1256	69.3886	57.9864
										9	ALL MEANS	0	0.0430442	0.0668463	0.0832259	0.0109911	0.0217187	0.00878311	0.00881368	0.11768	0.361103	ALL MEANS	0	11.9202	18.5117	23.0477	3.04377	6.01453	2.4323	2.44076	32.5891	100			Unmet Need, Intends Use	9.16202	12.4278	7.72076	6.06232	3.882	2.40317
										10	MEANS SSA	0.109461	0.00824403	0.0375313	0.00524268	0.040302	0.0229738	0.0494655	0.0498892	0.00399713	0.327107	MEANS SSA	33.4634	2.52029	11.4737	1.60274	12.3208	7.02333	15.1221	15.2516	1.22196	100			Unmet Need, Does Not Intend	11.1067	19.1173	15.6377	13.5422	13.7414	5.79017
										10	MEANS SSA	0	0.0113801	0.0502371	0.00896555	0.0301643	0.0309898	0.0185736	0.0293973	0.00324848	0.182956	MEANS SSA	0	6.22013	27.4585	4.90038	16.4872	16.9384	10.1519	16.068	1.77555	100			No Unmet Need, Intends Use	13.1061	6.856	5.063	3.27277	2.84573	1.24307
										10	MEANS SSA	0	0.00758304	0.0366148	0.00903094	0.0143866	0.0180395	0.0086448	0.018514	0.00194905	0.114763	MEANS SSA	0	6.60759	31.9048	7.86923	12.536	15.7189	7.53277	16.1324	1.69833	100			No Unmet Need, Does Not Intend	13.7979	12.1672	10.4797	7.81244	8.62757	0.905496
										10	MEANS SSA	0	0.00447825	0.0236474	0.00685793	0.00718383	0.0122432	0.00587766	0.012761	0.00183096	0.0748803	MEANS SSA	0	5.98054	31.5803	9.15852	9.59376	16.3504	7.84941	17.0419	2.44518	100			Infecund	1.71995	0.805289	0.552764	1.18473	1.51474	31.6716
										10	MEANS SSA	0	0.00303104	0.015824	0.00534523	0.00453953	0.00864249	0.00421401	0.00939731	0.0019208	0.0529144	MEANS SSA	0	5.72819	29.9049	10.1016	8.579	16.333	7.96382	17.7594	3.63002	100				100	100	100	100	100	100
										10	MEANS SSA	0	0.0109151	0.0467397	0.0226884	0.00774632	0.0142475	0.00900195	0.0110182	0.125022	0.247379	MEANS SSA	0	4.41231	18.8939	9.17148	3.13135	5.75936	3.63893	4.45395	50.5387	100
										11	MEANS NON-SSA	0.0588338	0.0121891	0.0353898	0.0129598	0.0213148	0.013338	0.0210371	0.01423	0.00208483	0.191377	MEANS NON-SSA	30.7423	6.36915	18.4922	6.77184	11.1376	6.96946	10.9925	7.43558	1.08939	100			MIDDLE EAST/N. AFRICA	Preg/1-11 mo.	12-23	24-35	36-47	48-59	60+
										11	MEANS NON-SSA	0	0.0155585	0.040291	0.0196981	0.0126572	0.0141826	0.0048002	0.0060541	0.00119464	0.114436	MEANS NON-SSA	0	13.5958	35.2082	17.2131	11.0605	12.3935	4.19465	5.29036	1.04393	100			Preg/Yr 1	32.7161	0	0	0	0	0
										11	MEANS NON-SSA	0	0.0120696	0.0313409	0.0190399	0.00747559	0.010119	0.00320504	0.00412866	0.000823111	0.0882018	MEANS NON-SSA	0	13.684	35.5332	21.5868	8.47556	11.4725	3.63375	4.68092	0.933214	100			Using, Traditional	8.5196	14.249	13.3869	14.0358	14.2198	16.0893
										11	MEANS NON-SSA	0	0.00982005	0.0239168	0.016865	0.00497771	0.00682123	0.00299823	0.00327562	0.000983167	0.0696578	MEANS NON-SSA	0	14.0976	34.3347	24.2112	7.14595	9.79249	4.30423	4.70245	1.41142	100			Using, Modern Short Acting	24.6811	40.0987	35.5866	33.8238	31.1133	21.7722
										11	MEANS NON-SSA	0	0.00833955	0.0181628	0.0161595	0.00338426	0.00593158	0.00247452	0.00283087	0.00114267	0.0584257	MEANS NON-SSA	0	14.2738	31.087	27.6582	5.7924	10.1523	4.23533	4.84524	1.95576	100			Using, Modern, Long Acting	7.80229	20.6623	25.7733	26.935	29.1195	28.1625
										11	MEANS NON-SSA	0	0.0760417	0.0874964	0.1454	0.0143237	0.0293918	0.00855836	0.00654962	0.11014	0.477901	MEANS NON-SSA	0	15.9116	18.3085	30.4247	2.9972	6.15018	1.79082	1.3705	23.0465	100			Using, Any Method	41.003	75.0101	74.7468	74.7945	74.4526	66.024
																																			Unmet Need, Intends Use	8.89672	8.66423	6.95054	6.57837	4.11773	2.97074
																																			Unmet Need, Does Not Intend	4.46283	7.79567	7.61155	6.28715	7.73972	5.2666
												1-2	1-2	1-2	1-2	1-2	1-2	1-2	1-2	1-2															No Unmet Need, Intends Use	8.78799	4.80758	5.74706	7.39445	8.28712	2.97764
																																			No Unmet Need, Does Not Intend	3.33843	3.09078	4.38852	4.27502	4.12787	1.39795
																																			Infecund	0.794973	0.631641	0.555567	0.670478	1.27497	21.3631
																																				100	100	100	100	100	100
												2-3	2-3	2-3	2-3	2-3	2-3	2-3	2-3	2-3
																																			EUROPE/W. ASIA	Preg/1-11 mo.	12-23	24-35	36-47	48-59	60+
																																			Preg/Yr 1	26.5522	0	0	0	0	0
																																			Using, Traditional	19.5559	41.9008	39.4384	40.3954	39.686	37.344
																																			Using, Modern Short Acting	17.0013	20.884	23.1624	21.2389	18.8417	12.6204
																																			Using, Modern, Long Acting	2.68448	11.3907	15.3037	17.3613	19.0897	18.1759
																																			Using, Any Method	39.2418	74.1756	77.9045	78.9956	77.6174	68.1403
												3-4	3-4	3-4	3-4	3-4	3-4	3-4	3-4	3-4															Unmet Need, Intends Use	7.66547	6.21047	5.1492	4.85189	2.33805	1.76063
																																			Unmet Need, Does Not Intend	9.73513	13.1063	11.2165	9.66357	11.693	10.1325
																																			No Unmet Need, Intends Use	8.21013	2.01625	2.09445	2.17966	3.10279	0.544789
																																			No Unmet Need, Does Not Intend	7.53344	4.30788	3.52343	4.10944	4.56353	0.978436
																																			Infecund	1.06184	0.183532	0.111959	0.199794	0.685245	18.4434
												4-5	4-5	4-5	4-5	4-5	4-5	4-5	4-5	4-5																100	100	100	100	100	100
																																			LATIN AMERICA	Preg/1-11 mo.	12-23	24-35	36-47	48-59	60+
																																			Preg/Yr 1	29.9939	0	0	0	0	0
																																			Using, Traditional	4.92578	12.0206	12.5095	13.3825	12.8686	10.0548
												5+	5+	5+	5+	5+	5+	5+	5+	5+															Using, Modern Short Acting	23.5727	44.759	45.0564	42.0755	37.4205	20.2688
																																			Using, Modern, Long Acting	8.65745	17.3669	20.682	24.5643	28.9313	39.904
																																			Using, Any Method	37.156	74.1465	78.248	80.0223	79.2204	70.2276
																																			Unmet Need, Intends Use	14.42	12.2118	9.62679	6.91607	6.86988	3.63251
																																			Unmet Need, Does Not Intend	4.35005	7.55713	7.36947	5.63361	6.4068	4.34485
																																			No Unmet Need, Intends Use	10.0349	2.96407	2.23791	3.3702	2.9593	2.47534
																																			No Unmet Need, Does Not Intend	3.601	2.2355	1.57527	2.45961	2.18768	1.82159
																																			Infecund	0.444194	0.884969	0.942566	1.59816	2.35593	17.4981
																																				100	100	100	100	100	100
																																			In: Ross J, Bietsch K. The open birth interval: a resource for reproductive health programs and women’s empowerment. Glob Health Sci Pract. 2019;7(3). https:/doi.org/10.9745/GHSP-D-19-00056
